# Supplementary material for: Genome-wide identification of PP2A gene family in Camellia sinensis reveals the potential role of CsPP2A-TON2/FASS1 in abiotic stress
Source: PeerJ. 2025 May 27;13:e19431. doi: 10.7717/peerj.19431 (PMC12124296; doi:10.7717/peerj.19431)
Supplement: Supplemental Information 3 [file peerj-13-19431-s003.xls]

## Sheet: Sheet1
ITEM TO CHECK	IMPORTANCE	CHECKLIST
EXPERIMENTAL DESIGN
Definition of experimental and control groups	E	Refer to line 205, 206, 207
Number within each group	E	Refer to line 201, 202
Assay carried out by core lab or investigator's lab?	D	Exp was performed in collaborator's lab in China
Acknowledgement of authors' contributions	D	Refer to line 718, 719
SAMPLE
Description	E	Refer to line 205, 206, 207
Volume/mass of sample processed	D	Refer to line 197
Microdissection or macrodissection	E	None
Processing procedure	E
If frozen - how and how quickly?	E	Refer to line 198, 199
If fixed - with what, how quickly?	E	None
Sample storage conditions and duration (especially for FFPE samples)	E	Refer to line 198, 199
NUCLEIC ACID EXTRACTION
Procedure and/or instrumentation	E	Section 2.9, line 195-209
Name of kit and details of any modifications	E	Section 2.9, line 195-210
Source of additional reagents used	D	None
Details of DNase or RNAse treatment	E	Section 2.9, line 195-212
Contamination assessment (DNA or RNA)	E	Section 2.9, line 195-213
Nucleic acid quantification	E	Section 2.9, line 195-214
Instrument and method	E	Section 2.9, line 195-215
Purity (A260/A280)	D	Section 2.9, line 195-216
Yield	D	Section 2.9, line 195-217
RNA integrity method/instrument	E	Section 2.9, line 195-218
RIN/RQI or Cq of 3' and 5' transcripts	E	Section 2.9, line 195-219
Electrophoresis traces	D	None
Inhibition testing (Cq dilutions, spike or other)	E	None
REVERSE TRANSCRIPTION
Complete reaction conditions	E	Section 2.9, line 195-219
Amount of RNA and reaction volume	E	Section 2.9, line 195-220
Priming oligonucleotide (if using GSP) and concentration	E	Section 2.9, line 195-221
Reverse transcriptase and concentration	E	Section 2.9, line 195-222
Temperature and time	E	Section 2.9, line 195-223
Manufacturer of reagents and catalogue numbers	D	None
Cqs with and without RT	D*	None
Storage conditions of cDNA	D	None
qPCR TARGET INFORMATION
If multiplex, efficiency and LOD of each assay.	E	None
Sequence accession number	E	Table S11
Location of amplicon	D	None
Amplicon length	E	150bp
In silico specificity screen (BLAST, etc)	E	150bp
Pseudogenes, retropseudogenes or other homologs?	D	None
Sequence alignment	D	None
Secondary structure analysis of amplicon	D	None
Location of each primer by exon or intron (if applicable)	E	None
What splice variants are targeted?	E	None
qPCR OLIGONUCLEOTIDES
Primer sequences	E	Table S11
RTPrimerDB Identification Number	D	None
Probe sequences	D**	None
Location and identity of any modifications	E	None
Manufacturer of oligonucleotides	D	None
Purification method	D	None
qPCR PROTOCOL
Complete reaction conditions	E	Section 2.9, line 195-223
Reaction volume and amount of cDNA/DNA	E	Section 2.9, line 195-224
Primer, (probe), Mg++ and dNTP concentrations	E	Section 2.9, line 195-225
Polymerase identity and concentration	E	Section 2.9, line 195-226
Buffer/kit identity and manufacturer	E	Section 2.9, line 195-227
Exact chemical constitution of the buffer	D
Additives (SYBR Green I, DMSO, etc.)	E	Section 2.9, line 195-227
Manufacturer of plates/tubes and catalog number	D
Complete thermocycling parameters	E	Section 2.9, line 195-227
Reaction setup (manual/robotic)	D
Manufacturer of qPCR instrument	E	Section 2.9, line 195-227
qPCR VALIDATION
Evidence of optimisation (from gradients)	D	Section 2.9, line 195-227
Specificity (gel, sequence, melt, or digest)	E	Section 2.9, line 195-228
For SYBR Green I, Cq of the NTC	E	Section 2.9, line 195-229
Standard curves with slope and y-intercept	E	Section 2.9, line 195-230
PCR efficiency calculated from slope	E	Section 2.9, line 195-231
Confidence interval for PCR efficiency or standard error	D	Section 2.9, line 195-232
r2 of standard curve	E	Section 2.9, line 195-233
Linear dynamic range	E	Section 2.9, line 195-234
Cq variation at lower limit	E	Section 2.9, line 195-235
Confidence intervals throughout range	D	Section 2.9, line 195-236
Evidence for limit of detection	E	Section 2.9, line 195-237
If multiplex, efficiency and LOD of each assay.	E	Section 2.9, line 195-238
DATA ANALYSIS
qPCR analysis program (source, version)	E	Section 2.9, line 195-238
Cq method determination	E	Section 2.9, line 195-239
Outlier identification and disposition	E	Section 2.9, line 195-240
Results of NTCs	E	Section 2.9, line 195-241
Justification of number and choice of reference genes	E	Section 2.9, line 195-242
Description of normalisation method	E	Section 2.9, line 195-243
Number and concordance of biological replicates	D	Section 2.9, line 195-244
Number and stage (RT or qPCR) of technical replicates	E	Section 2.9, line 195-245
Repeatability (intra-assay variation)	E	Section 2.9, line 195-246
Reproducibility (inter-assay variation, %CV)	D	None
Power analysis	D	None
Statistical methods for result significance	E	Section 2.10, line 214-216
Software (source, version)	E	Section 2.10, line 214-216
Cq or raw data submission using RDML	D	None
Table 1. MIQE checklist for authors, reviewers and editors. All essential information (E) must be submitted with the manuscript. Desirable
information (D) should be submitted if available. If using primers obtained from RTPrimerDB, information on qPCR target, oligonucleotides,
protocols and validation is available from that source.
*: Assessing the absence of DNA using a no RT assay is essential when first extracting RNA. Once the sample has been validated as
RDNA-free, inclusion of a no-RT control is desirable, but no longer essential.
**: Disclosure of the probe sequence is highly desirable and strongly encouraged. However, since not all commercial pre-designed assay
vendors provide this information, it cannot be an essential requirement. Use of such assays is advised against.
